# Supplementary material for: Hypoxia Differently Affects TGF-β2-Induced Epithelial Mesenchymal Transitions in the 2D and 3D Culture of the Human Retinal Pigment Epithelium Cells
Source: MDPI journal article supplement (doi:10.3390/ijms23105473), 2022-05-13
Supplement: s1 [file s1]

**Supplemental Table S1. The sequences of primers and probes used in this study.**

| Sequence                          |         |                                                       | Exon Location | RefSeq Number |
|-----------------------------------|---------|-------------------------------------------------------|---------------|---------------|
| human RPLP0 <sup>*1</sup>         | Probe   | 5'-/56-FAM/CCCTGTCTT/ZEN/CCCTGGGCATCAC/3IABkFQ/-3'    | 2-3           | NM_001002     |
|                                   | Primer2 | 5'-TCGTCTTTAAACCCTGCGTG-3'                            |               |               |
|                                   | Primer1 | 5'-TGTCTGCTCCCACAATGAAAC-3'                           |               |               |
| human COL1A1 <sup>*1</sup>        | Probe   | 5'-/56-FAM/TCGAGGGCC/ZEN/AAGACGAAGACATC/3IABkFQ/-3'   | 1-2           | NM_000088     |
|                                   | Primer2 | 5'-GACATGTTTACGCTTTGTGGAC-3'                          |               |               |
|                                   | Primer1 | 5'-TTCTGTACGCAGGTGATTGG-3'                            |               |               |
| human COL4A1 <sup>*1</sup>        | Probe   | 5'-/56-FAM/TCATACAGA/ZEN/CTTGCCAGCGGCT/3IABkFQ/-3'    | 51-52         | NM_001845     |
|                                   | Primer2 | 5'-AGAGAGGAGCGAGATGTTCA-3'                            |               |               |
|                                   | Primer1 | 5'-TGAGTCAGGCTTCATTATGTTCT-3'                         |               |               |
| human COL6A1 <sup>*1</sup>        | Probe   | 5'-/56-FAM/CAGGTTTCG/ZEN/GTCACAGCGGTAGT/3IABkFQ/-3'   | 2-3           | NM_001848     |
|                                   | Primer2 | 5'-CCTCGTGGACAAAGTCAAGT-3'                            |               |               |
|                                   | Primer1 | 5'-GTGAGGCCTTGGATGATCTC-3'                            |               |               |
| human FN1 <sup>*1</sup>           | Probe   | 5'-/56-FAM/TACAGCTTA/ZEN/TTCTCCCTCGCCCAG/3IABkFQ/-3'  | 3-4           | NM_212482     |
|                                   | Primer2 | 5'-CGTCCTAAAGACTCCATGATCTG-3'                         |               |               |
|                                   | Primer1 | 5'-ACCAATCTTGTAGGACTGACC-3'                           |               |               |
| human HIF1A <sup>*2</sup>         | Primer2 | 5'-CTCTGATCATCTGACCAAAACTCA-3'                        | 8-9           | NM_181054     |
|                                   | Primer1 | 5'-CAACCCAGACATATCCACCTC-3'                           |               |               |
| human HIF2A <sup>*2</sup>         | Primer2 | 5'-AGCCTATGAATTCTACCATGCG-3'                          | 7-8           | NM_001430     |
|                                   | Primer1 | 5'-CTTTGCGAGCATCCGTA-3'                               |               |               |
| human PGC1A <sup>*1</sup>         | Probe   | 5'-/56-FAM/ACCAGCCTC/ZEN/TTTGCCAGATCTTC/3IABkFQ/-3'   |               | NM_003299     |
|                                   | Primer2 | 5'-TGTCTGTATCCAAGTCGTTTAC-3'                          |               |               |
|                                   | Primer1 | 5'-GAGTCTGTTATGGAGTGACATCG-3'                         |               |               |
| human STAT3 <sup>*1</sup>         | Probe   | 5'-/56-FAM/AGCTGCACC/ZEN/TGATCACCTTTGAGAC/3IABkFQ/-3' | 14-16         | NM_213662     |
|                                   | Primer2 | 5'-AGGCATTTGGCATCTGACAG-3'                            |               |               |
|                                   | Primer1 | 5'-TGCTTCCCTGATTGTGACTG-3'                            |               |               |
| human IL6 <sup>*1</sup>           | Probe   | 5'-/56-FAM/CAACCACAA/ZEN/ATGCCAGCCTGCT/3IABkFQ/-3'    | 4-5           | NM_000600     |
|                                   | Primer2 | 5'-GCAGATGAGTACAAAAGTCCTGA-3'                         |               |               |
|                                   | Primer1 | 5'-TTCTGTGCCTGCAGCTTC-3'                              |               |               |
| Human FOS <sup>*1</sup>           | Probe   | 5'-/56-FAM/CAGCCGACT/ZEN/CCTTCTCCAGCATG/3IABkFQ/-3'   | 1-2           | NM_010234     |
|                                   | Primer2 | 5'-GGCACTAGAGACGGACAGAT-3'                            |               |               |
|                                   | Primer1 | 5'-ACAGCCTTTCCTACTACCATTTC-3'                         |               |               |
| Human TGF $\beta$ 1 <sup>*1</sup> | Probe   | 5'-/56-FAM/ACCCGCGTG/ZEN/CTAATGGTGGAA/3IABkFQ/-3'     | 1-2           | NM_000660     |
|                                   | Primer2 | 5'-GTTTCAAGTACCGCTTCTCG-3'                            |               |               |
|                                   | Primer1 | 5'-CCGACTACTACGCCAAGGA-3'                             |               |               |
| Human AGT <sup>*1</sup>           | Probe   | /56-FAM/AGAAACCTC/ZEN/TCATCGTTCCTTGGAAAGTG/3IABkFQ/   | 2-3           | NM_007428     |
|                                   | Primer2 | CACAGACACCGAGATGCT                                    |               |               |
|                                   | Primer1 | GCACCCTACTTTTCAACACCTA                                |               |               |
| Human MYC <sup>*1</sup>           | Probe   | /56-FAM/CGGTGTCTC/ZEN/CTCATGCAGCACT/3IABkFQ/          | 2-3           | NM_013261     |
|                                   | Primer2 | CTTCCCTCATCTTCTTGCTCTTCT                              |               |               |
|                                   | Primer1 | TTCTCTCCTTCCTCGGACTC                                  |               |               |

\*1 Taqman probes (IDT, Coralville, IA, USA). \*2 SYBR probes (IDT, Coralville, IA, USA).
